# Supplementary material
Source: Elsevier journal article supplement (https://authors.library.caltech.edu/42001/8/mmc2.xls)
Supplement: mmc2 [file mmc2.xls]

## Sheet: Table S1
Table S1. New core-top C. wuellerstorfi B/Ca
Data sourece: this study
Core	lon	lon	lat	WD	DCO3	B/Ca	Ref
ID	°W	oE	°N	m	umol/kg	umol/mol
TNO57-21	-7.8	7.8	-41.1	4981	-29.4376	123	This study
ODP1090	-8.9	8.9	-42.914	3702	-5.53771	178	This study
RC13-229	-11.33	11.33	-25.5	4191	-11.4743	163.786	This study
ODP849	110.518	249.482	0.183	3839	-12.0169	164.14	This study
ODP1238	82.7822	277.218	-1.872	2810	-3.59412	168.316	This study
MW91-9 GGC15	-161.317	161.317	-3.6	2310	5.42456	181.535	This study
MW91-9 GGC48	-161.017	161.017	-0.0235	3400	-5.80502	157.049	This study
MD01-2386	-130	130	1.1	2820	2.31552	175.341	This study
TNO13-PC72	139.403	220.597	0.1137	4298	-18.3582	148	This study
TNO13-PC61	139.832	220.168	-0.8633	4276	-18.3582	140.031	This study
BC56	-162	162	0	4040	-15	156.388	This study
BOFS 29K	21	339	20	4000	11.3365	207.263	This study
BOFS 29K	21	339	20	4000	11.3365	206.844	This study
ODP668B	20.9167	339.083	4.7666	2693	32.4623	213.84	This study
VM28-122	79	281	12	3623	20.5355	209.508	This study
KNR110-66	43.4	316.6	4.6	3550	25.9323	212.395	This study
KNR110-66	43.4	316.6	4.6	3550	25.9323	212.97	This study
BOFS 10K	20.7	339.3	54.7	2777	39.8291	215	This study
BOFS 10K	20.7	339.3	54.7	2777	39.8291	213.893	This study
BOFS 14K	19.4	340.6	58.6	1756	58.2947	235.325	This study
Wind 28K	-51.7703	51.7703	-10.1555	4147	-11.6418	152.008	This study
BOFS 11K	20.4	339.6	55.2	2004	56.4527	228.25	This study
BOFS 11K	20.4	339.6	55.2	2004	56.4527	220.046	This study
NEAP 8K	22.12	337.88	59.44	2360	47.2986	220	This study
NEAP 8K	22.12	337.88	59.44	2360	47.2986	218.582	This study
BOFS 8K	22.1	337.9	52.5	4045	12.2376	205.304	This study

## Sheet: Table S2
Table S2. VM28-122 benthic d18O and d13C data
Data source:
Unless noted, data are from this study.
Depth	Cal. Age	d18O	d13C	Species	Ref
cm	kyr	‰	‰
1.5	2.64741	2.37	0.62	C. wuel	Oppo & Fairbanks, 1987
3.5	2.97977	2.3	0.92	C. wuel	Oppo & Fairbanks, 1987
5	3.22903	2.061	0.854	C. wuel	Oppo & Fairbanks, 1987
11	4.2261	2.33	0.93	C. wuel	Oppo & Fairbanks, 1987
12	4.39228	2.298	0.924	C. wuel	Oppo & Fairbanks, 1987
16	5.05699	2.31	0.66	C. wuel	Oppo & Fairbanks, 1987
21	5.88788	2.26	0.78	C. wuel	Oppo & Fairbanks, 1987
26	6.69575	2.31	0.79	C. wuel	Oppo & Fairbanks, 1987
31	7.44992	2.46	0.81	C. wuel	Oppo & Fairbanks, 1987
36	8.20408	2.46	0.76	C. wuel	Oppo & Fairbanks, 1987
41	8.95825	2.42	0.88	C. wuel	Oppo & Fairbanks, 1987
46	9.71242	2.45	0.69	C. wuel	Oppo & Fairbanks, 1987
51	10.4305	2.4	0.76	C. wuel	Oppo & Fairbanks, 1987
56	11.1124	2.52	0.58	C. wuel	Oppo & Fairbanks, 1987
61	11.7944	2.42	0.66	C. wuel	Oppo & Fairbanks, 1987
65	12.34	2.55	0.53	C. wuel	Oppo & Fairbanks, 1987
71	13.1583	3.08	0.74	C. wuel	Oppo & Fairbanks, 1987
76	13.824	3.15	0.6	C. wuel	Oppo & Fairbanks, 1987
77	13.9495	2.987	0.769	C. wuel	Oppo & Fairbanks, 1987
82	14.5772	3.027	0.573	C. wuel	Oppo & Fairbanks, 1987
82.5	14.64	3.2	0.56	C. wuel	Oppo & Fairbanks, 1987
86	15.0794	3.15	0.41	C. wuel	Oppo & Fairbanks, 1987
91	15.7071	3.1	0.42	C. wuel	Oppo & Fairbanks, 1987
94	16.0837	3.21	0.751	C. wuel	Oppo & Fairbanks, 1987
97	16.4604	2.84	0.79	C. wuel	Oppo & Fairbanks, 1987
102	17.0779	3.503	0.879	C. wuel	Oppo & Fairbanks, 1987
107	17.7067	3.374	1.036	C. wuel	Oppo & Fairbanks, 1987
111	18.3999	3.79	1.1	C. wuel	Oppo & Fairbanks, 1987
116	19.2665	3.74	1.03	C. wuel	Oppo & Fairbanks, 1987
121	20.0083	3.56	1.13	C. wuel	Oppo & Fairbanks, 1987
125	20.4398	3.84	1.15	C. wuel	Oppo & Fairbanks, 1987
128	20.7362	3.87	1.17	C. wuel	Oppo & Fairbanks, 1987
135	21.5235	3.87	1.2	C. wuel	Oppo & Fairbanks, 1987
139	22.3014	3.9778	1.12275	CIBS
141	22.6904	3.86	1.2	C. wuel	Oppo & Fairbanks, 1987
145	23.4684	3.69	1.03	C. wuel	Oppo & Fairbanks, 1987
151.5	24.7326	3.81	1.23	C. wuel	Oppo & Fairbanks, 1987
156.5	25.705	3.81	1.18	C. wuel	Oppo & Fairbanks, 1987
160	26.3857	3.84	0.96	CIBS
171.5	28.6224	3.62	1.11	C. wuel	Oppo & Fairbanks, 1987
176	29.4976	3.74	1.12	C. wuel	Oppo & Fairbanks, 1987
181.8	30.6256	3.73	1.19	C. wuel	Oppo & Fairbanks, 1987
186	31.4425	3.68	1.2	C. wuel	Oppo & Fairbanks, 1987
191	32.4149	3.8	1.17	C. wuel	Oppo & Fairbanks, 1987
195	33.1929	3.59	1.22	C. wuel	Oppo & Fairbanks, 1987
201	34.3598	3.2	1.09	C. wuel	Oppo & Fairbanks, 1987
209	35.9157	3.52942	1.00818	CIBS
219	37.8606	3.73095	1.01076	CIBS
229	39.8055	3.62252	0.948904	CIBS
239	40.75	3.68406	0.966911	CIBS
249	41.5833	3.35878	0.813452	CIBS
258	42.3333	3.37033	0.544226	CIBS
261	42.5833	3.16	0.78	CIBS
269	43.25	3.53	0.97	CIBS
280	44.1667	3.6	0.96	CIBS
289	44.9167	3.54	0.77	CIBS
301	45.9167	3.2619	0.963911	CIBS
311	46.75	3.59	0.98	CIBS
321	47.5833	3.16	0.94	CIBS
349	49.9167	3.48342	1.04072	CIBS
351	50.0833	3.55	1.04	CIBS
359	50.75	3.42498	0.731053	CIBS
361	50.9167	3.52	1.03	CIBS
369	51.5833	3.37	0.84	CIBS
371	51.75	3.39	0.99	C. wuel
380	52.5	3.40654	0.69826	CIBS
381	52.5833	3.41	0.73	CIBS
389	53.25	3.48808	0.736993	CIBS
391	53.4167	3.54	0.88	CIBS
401	54.25	3.11969	0.512716	CIBS
409	54.9167	3.17123	0.445455	CIBS
411	55.3333	3.11	0.35	CIBS
420	58.3333	3.36	0.48	CIBS
431	62	3.86	0.64	CIBS
441	65.15	3.64273	0.834832	CIBS
451	66.65	3.67	0.73	CIBS
459	67.85	3.61	0.99	C. wuel
470	69.5	3.04	0.64	CIBS
490	72.5	3.68	0.34	CIBS
500	74	3.24	0.58	CIBS
510	75.5	3.12	0.77	CIBS
521	77.15	3.12	0.91	CIBS
530	78.5	3.17	0.74	CIBS
540	80	2.91748	0.619991	C. wuel
541	80.15	2.94	0.89	CIBS
550	81.5	2.85	0.85	C. wuel
559	82.85	2.69906	0.561856	CIBS
561	83.7	2.73	0.49	C. wuel
570	90	3.31	0.23	CIBS
580	91.25	3.15	0.51	CIBS
590	92.5	2.97	0.55	CIBS
601	93.875	3.09	0.22	CIBS
610	95	2.79	0.71	CIBS
611	95.2143	2.89	0.56	CIBS
619	96.9286	3	0.73	CIBS
630	99.2857	2.83	0.68	C. wuel
650	103.571	2.99058	0.497185	CIBS
661	105.929	3.10212	0.64191	CIBS
679	109.786	3.24	0.55	CIBS
680	110	3.11367	0.629505	CIBS
690	113	3.13522	0.392049	CIBS
699	115.7	2.83681	0.51853	CIBS
700	116	2.89	0.55	CIBS
710	119	2.36842	0.372541	CIBS
720	122	2.26998	0.385255	CIBS
730	125	2.37152	0.316306	CIBS
739	129.5	2.55373	0.178624	CIBS
740	130	2.88193	0.390447	CIBS
750	135	4.02003	0.767519	CIBS
759	139.5	4.19	1.04	C. wuel
761	140.5	3.9	0.91	CIBS
770	145	3.65831	0.649513	CIBS
780	150	3.62	0.68	CIBS
790	155	3.48	0.63	CIBS
800	160	3.54655	0.54446	CIBS
809	164.5	2.93486	0.648934	CIBS

## Sheet: Table S3
Table S3. VM28-122 C. wuellerstorfi B/Ca and calculated DCO3 and CO3
Data sources:
(1) Yu, J.M., Foster, G.L., Elderfield, H., Broecker, W.S. and Clark, E., 2010. An evaluation of benthic foraminiferal B/Ca and d11B for deep ocean carbonate ion and pH reconstructions. Earth Planet. Sci. Lett., 293(1-2): 114-120, 10.1016/j.epsl.2010.02.029
(2) Yu, J. et al., 2010. Loss of carbon from the deep sea since the Last Glacial Maximum. Science, 330: 1084-1087, doi: 10.1126/science.1193221.
	avg=	216.256		4.40865
Depth	Cal. Age	B/Ca	avg B/Ca	sd B/Ca	avg DCO3	avg CO3	sd CO3	Ref		interpolated d13C
cm	ka	umol/mol	umol/mol	umol/mol	umol/kg	umolkg	umolkg
4	3.06286	209.508	209.508		28.4281	114.428		(1)		0.898
10	4.05992	203.431	202.36	1.51518	22.1576	108.158	1.32911	(1)		0.917333
10	4.05992	201.288						(1)
21	5.88788	206.784	208.697	2.70484	27.7166	113.717	2.37266	(1)		0.78
21	5.88788	210.609						(1)
31	7.44992	217.11	217.11		35.0963	121.096		(1)		0.81
41	8.95825	211.871	214.591	3.84739	32.8869	118.887	3.37491	(1)		0.88
41	8.95825	217.312						(1)
51	10.4305	220.063	220.063		37.687	123.687		(1)		0.76
59	11.5216	213.155	211.33	2.58113	30.026	116.026	2.26415	(1)		0.628
59	11.5216	209.505						(1)
69	12.8855	219.002	215.462	4.00312	33.6512	119.651	3.51151	(1)		0.67
69	12.8855	209.841						(1)
69	12.8855	217.448						(1)
69	12.8855	215.558						(1)
79	14.2006	216.916	218.51	1.38057	36.3246	122.325	1.21103	(1)		0.6906
79	14.2006	219.279						(1)
79	14.2006	219.335						(1)
89	15.456	208.974	208.974		27.9595	113.96		(1)		0.416
92	15.8327	209.915	209.915		28.7848	114.785		(2)		0.530333
94	16.0837	220.787	220.787		38.3223	124.322		(2)		0.751
100	16.837	228.174	228.174		44.8014	130.801		(2)		0.8434
103	17.1984	242.637	242.73	4.4276	57.5702	143.57	3.88386	(1)		0.9104
103	17.1984	238.35						(1)
103	17.1984	247.204						(1)
108	17.88	240.987	238.866	2.99999	54.1807	140.181	2.63157	(1)		1.052
108	17.88	236.745						(1)
109	18.0533	244.515	244.515		59.136	145.136		(1)		1.068
121	20.0083	242.996	242.996		57.8038	143.804		(1)		1.13
139	22.3014	251.007	248.964	1.8557	63.0384	149.038	1.6278	(1)		1.12275
139	22.3014	247.384						(1)
139	22.3014	248.5						(1)
149	24.2463	247.52	246.732	1.11398	61.0808	147.081	0.977179	(1)		1.15308
149	24.2463	245.944						(1)
165	27.3582	242.308	242.308		57.2	143.2		(1)		1.02522
179	30.081	240.905	240.905		55.9696	141.97		(1)		1.15621
189	32.0259	238.189	238.189		53.5869	139.587		(1)		1.182
208	35.7212	227.437	223.95	4.9309	41.0966	127.097	4.32535	(1)		1.01841
208	35.7212	220.463						(1)
219	37.8606	229.806	233.097	4.6542	49.1203	135.12	4.08263	(1)		1.01076
219	37.8606	236.388						(1)
229	39.8055	227.213	227.213		43.9591	129.959		(1)		0.948904
239	40.75	244.535	244.535		59.1537	145.154		(1)		0.966911
249	41.5833	244.996	244.996		59.5576	145.558		(1)		0.813452
258	42.3333	226.799	226.799		43.5953	129.595		(1)		0.544226
269	43.25	235.389	235.389		51.1307	137.131		(1)		0.97
280	44.1667	235.207	235.207		50.971	136.971		(1)		0.96
289	44.9167	246.798	242.273	6.39962	57.1693	143.169	5.6137	(1)		0.77
289	44.9167	237.748						(1)
301	45.9167	236.917	233.794	4.41522	49.732	135.732	3.873	(1)		0.963911
301	45.9167	230.672						(1)
311	46.75	236.185	237.469	1.81618	52.9551	138.955	1.59314	(1)		0.98
311	46.75	238.753						(1)
321	47.5833	235.488	235.488		51.2173	137.217		(1)		0.94
330	48.3333	232.45	232.45		48.5525	134.552		(1)		0.972373
331	48.4167	225.181	225.181		42.1761	128.176		(1)		0.97597
341	49.25	229.113	229.113		45.6255	131.625		(1)		1.01194
349	49.9167	224.329	225.81	2.09489	42.7284	128.728	1.83762	(1)		1.04072
349	49.9167	227.292						(1)
351	50.0833	227.647	227.647		44.3395	130.339		(1)		1.04
359	50.75	226.394	226.394		43.2402	129.24		(1)		0.731053
361	50.9167	221.519	221.519		38.9639	124.964		(1)		1.03
369	51.5833	224.64	223.745	1.26649	40.9165	126.916	1.11096	(1)		0.84
369	51.5833	222.849						(1)
380	52.5	221.457	222.148	0.977711	39.5158	125.516	0.857641	(1)		0.69826
380	52.5	222.839						(1)
381	52.5833	225.312	225.312		42.2909	128.291		(1)		0.73
389	53.25	226.924	226.924		43.7049	129.705		(1)		0.736993
401	54.25	226.531	226.531		43.361	129.361		(1)		0.512716
409	54.9167	215.061	215.061		33.2991	119.299		(1)		0.445455
425	60	219.358	219.358		37.0687	123.069		(1)		0.552727
441	65.15	229.884	229.884		46.302	132.302		(1)		0.834832
451	66.65	228.879	228.879		45.4199	131.42		(1)		0.73
470	69.5	209.648	209.648		28.5505	114.55		(1)		0.64
471	69.65	203.549	203.549		23.2009	109.201		(1)		0.625
480	71	208.56	208.56		27.5966	113.597		(1)		0.49
490	72.5	199.267	199.267		19.4443	105.444		(1)		0.34
500	74	205.912	208.063	3.0409	27.1602	113.16	2.66745	(1)		0.58
500	74	210.213						(1)
501	74.15	229.425	214.343	21.3296	32.6692	118.669	18.7101	(1)		0.599
501	74.15	199.261						(1)
510	75.5	203.929	201.484	3.45814	21.3894	107.389	3.03345	(1)		0.77
510	75.5	199.039						(1)
511	75.65	208.503	207.718	1.10887	26.8583	112.858	0.972693	(1)		0.782727
511	75.65	206.934						(1)
520	77	188.061	184.884	4.49263	6.82848	92.8285	3.94091	(1)		0.897273
520	77	181.708						(1)
521	77.15	197.765	197.765		18.1276	104.128		(1)		0.91
530	78.5	193.261	198.621	7.58061	18.8784	104.878	6.64966	(1)		0.74
530	78.5	203.982						(1)
531	78.65	189.269	191.166	2.68287	12.3388	98.3388	2.35339	(1)		0.727999
531	78.65	193.063						(1)
540	80	192.23	194.728	2.27515	15.463	101.463	1.99575	(1)		0.619991
540	80	195.272						(1)
540	80	196.682						(1)
541	80.15	188.404	187.353	1.48633	8.99369	94.9937	1.30379	(1)		0.89
541	80.15	186.302						(1)
550	81.5	207.691	206.268	2.01188	25.5859	111.586	1.76481	(1)		0.85
550	81.5	204.845						(1)
551	81.65	233	224.461	7.93166	41.5449	127.545	6.9576	(1)		0.817984
551	81.65	223.061						(1)
551	81.65	217.323						(1)
559	82.85	194.09	188.243	8.26905	9.77456	95.7746	7.25355	(1)		0.561856
559	82.85	182.396						(1)
561	83.7	235.266	235.266		51.0224	137.022		(1)		0.49
570	90	209.003	209.003		27.985	113.985		(1)		0.23
571	90.125	204.126	205.988	2.63346	25.3405	111.34	2.31005	(1)		0.258
571	90.125	207.85						(1)
580	91.25	207.097	207.097		26.3133	112.313		(1)		0.51
581	91.375	199.276	205.261	8.464	24.7025	110.703	7.42456	(1)		0.514
581	91.375	211.246						(1)
590	92.5	210.579	201.678	9.77897	21.5598	107.56	8.57804	(1)		0.55
590	92.5	203.246						(1)
590	92.5	191.21						(1)
600	93.75	215.634	214.367	1.79231	32.6904	118.69	1.5722	(1)		0.25
600	93.75	213.1						(1)
601	93.875	219.822	219.822		37.4751	123.475		(1)		0.22
610	95	205.155	204.892	2.7874	24.379	110.379	2.44509	(1)		0.71
610	95	201.983						(1)
610	95	207.539						(1)
611	95.2143	221.955	223.353	1.97706	40.5725	126.573	1.73426	(1)		0.56
611	95.2143	224.751						(1)
619	96.9286	214.69	209.376	6.13884	28.3123	114.312	5.38495	(1)		0.73
619	96.9286	203.399						(1)
619	96.9286	204.764						(1)
619	96.9286	214.651						(1)
621	97.3571	230.598	230.598		46.9285	132.928		(1)		0.720909
630	99.2857	205.758	210.739	4.54798	29.5075	115.508	3.98946	(1)		0.68
630	99.2857	214.67						(1)
630	99.2857	211.788						(1)
631	99.5	222.34	222.766	0.601418	40.0576	126.058	0.527559	(1)		0.670859
631	99.5	223.191						(1)
640	101.429	216.005	214.877	1.59547	33.1376	119.138	1.39953	(1)		0.588592
640	101.429	213.749						(1)
641	101.643	227.615	227.615		44.311	130.311		(1)		0.579452
650	103.571	216.696	216.426	0.380895	34.4967	120.497	0.334118	(1)		0.497185
650	103.571	216.157						(1)
660	105.714	205.028	205.028		24.498	110.498		(1)		0.628753
661	105.929	217.173	205.517	10.1067	24.9271	110.927	8.86549	(1)		0.64191
661	105.929	200.185						(1)
661	105.929	199.193						(1)
669	107.643	216.033	206.015	8.67889	25.3642	111.364	7.61306	(1)		0.601061
669	107.643	201.229						(1)
669	107.643	200.783						(1)
670	107.857	226.856	224.86	2.82217	41.8949	127.895	2.47559	(1)		0.595955
670	107.857	222.865						(1)
679	109.786	192.328	197.504	5.80681	17.8983	103.898	5.09369	(1)		0.55
679	109.786	196.401						(1)
679	109.786	203.783						(1)
680	110	187.674	187.674		9.27558	95.2756		(1)		0.629505
690	113	191.655	190.254	5.08921	11.5385	97.5385	4.46422	(1)		0.392049
690	113	183.555						(1)
690	113	195.803						(1)
690	113	190.002						(1)
699	115.7	187.793	190.073	4.88415	11.3797	97.3797	4.28435	(1)		0.51853
699	115.7	195.68						(1)
699	115.7	186.746						(1)
700	116	216.768	211.326	7.69644	30.0228	116.023	6.75127	(1)		0.55
700	116	205.884						(1)
710	119	202.702	191.764	7.20262	12.8628	98.8628	6.31809	(1)		0.372541
710	119	193.685						(1)
710	119	183.277						(1)
710	119	188.439						(1)
710	119	190.717						(1)
720	122	202.728	199.865	10.6111	19.969	105.969	9.30797	(1)		0.385255
720	122	212.678						(1)
720	122	187.416						(1)
720	122	196.636						(1)
730	125	208.59	202.028	5.68283	21.8668	107.867	4.98494	(1)		0.316306
730	125	198.705						(1)
730	125	198.79						(1)
739	129.5	191.833	194.549	3.84139	15.3063	101.306	3.36964	(1)		0.178624
739	129.5	197.265						(1)
750	135	229.976	233.246	8.89897	49.2505	135.251	7.80611	(1)		0.767519
750	135	240.66						(1)
750	135	240.209						(1)
750	135	222.136						(1)
759	139.5	221.401	223.893	4.19264	41.0464	127.046	3.67776	(1)		1.04
759	139.5	221.545						(1)
759	139.5	228.733						(1)
760	140	259.942	256.651	4.65445	69.7813	155.781	4.08285	(1)		0.975
760	140	253.36						(1)
770	145	222.182	218.682	6.00568	36.4755	122.476	5.26814	(1)		0.649513
770	145	224.179						(1)
770	145	220.623						(1)
770	145	217.585						(1)
770	145	208.841						(1)
771	145.5	246.774	243.838	4.15271	58.5421	144.542	3.64273	(1)		0.652561
771	145.5	240.902						(1)
780	150	226.245	225.105	1.61256	42.1095	128.109	1.41453	(1)		0.68
780	150	223.965						(1)
781	150.5	246.084	246.084		60.5123	146.512		(1)		0.675
790	155	227.216	224.037	2.92068	41.1732	127.173	2.562	(1)		0.63
790	155	223.424						(1)
790	155	221.472						(1)
791	155.5	226.033	226.033		42.9238	128.924		(1)		0.621446
800	160	220.875	220.656	0.308788	38.2075	124.207	0.270866	(1)		0.54446
800	160	220.438						(1)

## Sheet: Table S4
Table S4. MW91-9 GGC15 benthic d18O and d13C
Data source:
Age < 50 ka, data from Yu, J. et al., 2010. Loss of carbon from the deep sea since the Last Glacial Maximum. Science, 330: 1084-1087, doi: 10.1126/science.1193221.
Age > 50 ka, data from this study
Depth	Depth	Mid	Age	d18O	d13C	d18O	d13C	d18O	d13C
top	bottom	depth	ka	cib+cw	cib+cw	avg	avg	sd	sd
cm	cm	cm
2	3	2.5	3.652	2.23878	0.328114	2.23878	0.328114
6	7	6.5	4.62	3.06	0.12	3.06	0.12
8	9	8.5	5.104	2.72	0.41	2.61923	0.398616	0.142504	0.0161
8	9	8.5	5.104	2.51847	0.387231
12	13	12.5	6.072	3.38	0.284706	3.38	0.284706
16	17	16.5	7.51167	2.68	0.25	2.68	0.25
18	19	18.5	8.46733	3.23855	0.238845	3.23855	0.238845
20	21	20.5	9.423	2.79	0.25	2.79	0.25
24	25	24.5	11.4694	3.31	-0.03	3.31	-0.03
26	27	26.5	12.4926	3.96	-0.17	3.96	-0.17
28	29	28.5	13.5158	3.87	-0.02	3.87	-0.02
30	31	30.5	14.539	3.9439	-0.275082	3.9439	-0.275082
32	33	32.5	15.583	3.52062	0.0765586	3.52062	0.0765586
34	35	34.5	16.627	4.03	-0.04	4.12289	-0.0402631	0.131364	0.000372143
34	35	34.5	16.627	4.21578	-0.0405263
36	37	36.5	18.1967	4.15	-0.14	4.15	-0.14
40	41	40.5	21.336	4.2	-0.05	4.2	-0.05
42	43	42.5	22.9343	3.99	-0.18	3.99	-0.18
44	45	44.5	24.5327	3.79	-0.06	3.92015	-0.0461201	0.184062	0.0196291
44	45	44.5	24.5327	4.0503	-0.0322403
46	47	46.5	26.131	4.1	0.01	4.1	0.01
48	49	48.5	27.1265	4.16	-0.04	4.16	-0.04
50	51	50.5	28.122	4.07	-0.03	4.07	-0.03
52	53	52.5	29.1174	3.96	0	3.96	0
54	55	54.5	30.1129	3.72	0.07	3.72	0.07
56	57	56.5	31.1084	3.55	0.02	3.55	0.02
58	59	58.5	32.1039	3.92	0.04	3.92	0.04
60	61	60.5	33.0994	3.99	0.09	3.99	0.09
64	65	64.5	35.0903	3.92	0.16	3.92	0.16
68	69	68.5	37.0813	3.54	0.14	3.59965	0.105982	0.0843609	0.0481081
68	69	68.5	37.0813	3.6593	0.0719649
72	73	72.5	39.0723	3.76	0.02	3.76	0.02
76	77	76.5	41.0632	3.87	0.16	3.87	0.16
80	81	80.5	43.0542	3.59	0.06	3.59	0.06
84	85	84.5	45.0452	3.86	0.28	3.83703	0.222871	0.0324807	0.0807928
84	85	84.5	45.0452	3.81407	0.165742
88	89	88.5	47.0361	3.7	0.09	3.7	0.09
92	93	92.5	49.0271	3.62	0.1	3.62	0.1
96	97	96.5	51.0181	3.72	0.29	3.74934	0.219117	0.041496	0.100244
96	97	96.5	51.0181	3.77868	0.148233
100	101	100.5	53.009	3.66	-0.03	3.66	-0.03
104	105	104.5	55	3.33	0	3.33	0
108	109	108.5	56.75	3.33	0.01	3.46392	-0.0381903	0.189389	0.0681513
108	109	108.5	56.75	3.59784	-0.0863806
114	115	114.5	59.375	3.59	-0.27	3.59	-0.27
120	121	120.5	62	3.53	-0.18	3.46116	-0.11232	0.0973527	0.0957138
120	121	120.5	62	3.39232	-0.0446403
124	125	124.5	63.75	3.51	-0.25	3.51	-0.25
128	129	128.5	65.5	3.83	-0.15	3.83	-0.15
132	133	132.5	67.25	3.67	-0.22	3.67	-0.22
136	137	136.5	69	3.55	0.19	3.47813	0.151396	0.101637	0.0545939
136	137	136.5	69	3.40626	0.112793
140	141	140.5	70.75	3.67	0.1	3.67	0.1
144	145	144.5	72.5	3.37	0.06	3.37	0.06
148	149	148.5	74.25	3.33	0.06	3.33	0.06
152	153	152.5	76	3.06	0.13	3.06	0.13
156	157	156.5	77.75	3.21075	0.239803	3.21075	0.239803
160	161	160.5	79.5	3.07	0.15	3.07	0.15
164	165	164.5	81.25	2.88	0.06	2.88	0.06
168	169	168.5	83	2.86	0.02	2.86	0.02
172	173	172.5	84	2.95	0.04	2.95	0.04
176	177	176.5	85	3.06	0.17	3.06	0.17
180	181	180.5	86	3.13	0.12	3.13	0.12
184	185	184.5	87	3.21	0.18	3.21	0.18
188	189	188.5	90	3.10531	0.160454	3.10531	0.160454
192	193	192.5	93	3.08	0.11	3.08	0.11
196	197	196.5	96	2.94	0.2	2.94	0.2
200	201	200.5	98.8889	3.12	0.02	3.12	0.02
202	203	202.5	100.333	3.20003	0.0208412	3.20003	0.0208412
204	205	204.5	101.778	3.08	0.06	3.08	0.06
206	207	206.5	103.222	3.18	0.04	3.18	0.04
208	209	208.5	104.667	3.22	0.05	3.22	0.05
212	213	212.5	107.556	3.13	0.07	3.13	0.07
214	215	214.5	109	3.38	0.18	3.38	0.18
216	217	216.5	109.5	2.97	0.16	2.97	0.16
218	219	218.5	110	3.19	-0.01	3.19	-0.01
220	221	220.5	110.5	3.06	-0.01	3.06	-0.01
222	223	222.5	111	3.05455	0.0712553	3.05455	0.0712553
224	225	224.5	111.5	2.9	0.1	2.9	0.1
226	227	226.5	112	3.18	0	3.18	0
228	229	228.5	113.222	3.19	0.09	3.19	0.09
232	233	232.5	115.667	3.28	0.04	3.28	0.04
234	235	234.5	116.889	3.19	-0.01	3.19	-0.01
236	237	236.5	118.111	2.76897	0.115701	2.76897	0.115701
238	239	238.5	119.333	2.97	0.13	2.97	0.13
240	241	240.5	120.556	2.87	0.17	2.87	0.17
242	243	242.5	121.778	2.35327	0.078932	2.35327	0.078932
244	245	244.5	123	2.13	0	2.13	0
248	249	248.5	125	2.46	-0.08	2.46	-0.08
250	251	250.5	126	2.36	-0.03	2.36	-0.03
252	253	252.5	127	3.22	-0.1	3.22	-0.1
256	257	256.5	129	3.51	-0.08	3.51	-0.08
258	259	258.5	130	3.2	-0.07	3.17	-0.1	0.0424264	0.0424264
258	259	258.5	130	3.14	-0.13
260	261	260.5	132.5	3.73	-0.18	3.73	-0.18
262	263	262.5	135	4.15	-0.19	4.15	-0.19
264	265	264.5	136.167	3.69	-0.08	3.69	-0.08
266	267	266.5	137.333	3.79	-0.19	3.79	-0.19
268	269	268.5	138.5	4.04	-0.36	4.04	-0.36
270	271	270.5	139.667	4.02	-0.25	4.02	-0.25
272	273	272.5	140.833	3.94	-0.31	3.94	-0.31
274	275	274.5	142	3.85	-0.43	3.85	-0.43

## Sheet: Table S5
Table S5. MW91-9 GGC15 C.wuellerstorfi B/Ca and calculated DCO3 and CO3.
Data source:
Age < 50 ka, data from Yu, J. et al., 2010. Loss of carbon from the deep sea since the Last Glacial Maximum. Science, 330: 1084-1087, doi: 10.1126/science.1193221.
Age > 50 ka, data from this study
			avg=	176.065		2.75124
Depth	Depth	Mid	Age	B/Ca	avg B/Ca	sd B/Ca	DCO3	CO3	sd CO3
top	bottom	depth	ka	umol/mol	umol/mol	umol/mol	umol/kg	umol/kg	umol/kg
cm	cm	cm
2	3	2.5	3.652	181.535	181.535		6	73
4	5	4.5	4.136	176.603	176.603		1.67326	68.6733
6	7	6.5	4.62	177.592	177.592		2.54146	69.5415
8	9	8.5	5.104	177.395	177.395		2.36825	69.3682
10	11	10.5	5.588	180.411	180.411		5.01357	72.0136
12	13	12.5	6.072	182.564	182.564		6.90252	73.9025
14	15	14.5	6.556	180.083	180.083		4.72601	71.726
16	17	16.5	7.51167	179.18	179.18		3.93373	70.9337
18	19	18.5	8.46733	181.265	184.299	4.28998	8.42395	75.424	3.76314
18	19	18.5	8.46733	187.332
20	21	20.5	9.423	176.828	174.45	3.36194	-0.214872	66.7851	2.94907
20	21	20.5	9.423	172.073
22	23	22.5	10.4462	182.054	182.054		6.45473	73.4547
24	25	24.5	11.4694	180.651	180.651		5.22436	72.2244
26	27	26.5	12.4926	182.704	182.704		7.02528	74.0253
28	29	28.5	13.5158	177.935	177.935		2.8417	69.8417
30	31	30.5	14.539	177.956	177.956		2.86021	69.8602
32	33	32.5	15.583	177.428	177.428		2.39689	69.3969
34	35	34.5	16.627	179.809	179.809		4.48592	71.4859
36	37	36.5	18.1967	179.254	179.254		3.99928	70.9993
38	39	38.5	19.7663	181.217	181.217		5.72109	72.7211
40	41	40.5	21.336	179.624	179.624		4.32315	71.3231
42	43	42.5	22.9343	183.413	183.413		7.64747	74.6475
44	45	44.5	24.5327	176.629	176.629		1.69667	68.6967
46	47	46.5	26.131	175.051	178.305	3.77446	3.16619	70.1662	3.31093
46	47	46.5	26.131	182.443
46	47	46.5	26.131	177.42
48	49	48.5	27.1265	177.292	178.489	1.07709	3.328	70.328	0.944816
48	49	48.5	27.1265	179.379
48	49	48.5	27.1265	178.796
50	51	50.5	28.122	176.2	176.2		1.32024	68.3202
52	53	52.5	29.1174	181.355	181.355		5.84229	72.8423
54	55	54.5	30.1129	180.325	180.325		4.9387	71.9387
56	57	56.5	31.1084	181.845	181.845		6.27217	73.2722
58	59	58.5	32.1039	181.77	181.77		6.20631	73.2063
60	61	60.5	33.0994	178.173	173.456	4.14162	-1.08714	65.9129	3.633
60	61	60.5	33.0994	171.779
60	61	60.5	33.0994	170.416
64	65	64.5	35.0903	187.058	181.834	4.47811	6.26168	73.2617	3.92817
64	65	64.5	35.0903	176.213
64	65	64.5	35.0903	181.26
64	65	64.5	35.0903	182.804
68	69	68.5	37.0813	180.982	180.033	1.34197	4.68238	71.6824	1.17717
68	69	68.5	37.0813	179.084
72	73	72.5	39.0723	175.927	175.927		1.08089	68.0809
76	77	76.5	41.0632	179.977	179.977		4.63291	71.6329
80	81	80.5	43.0542	182.387	182.387		6.74729	73.7473
84	85	84.5	45.0452	181.036	181.036		5.56176	72.5618
88	89	88.5	47.0361	180.644	176.798	3.33503	1.84448	68.8445	2.92547
88	89	88.5	47.0361	175.038
88	89	88.5	47.0361	174.712
92	93	92.5	49.0271	180.354	180.354		4.96376	71.9638
96	97	96.5	51.0181	185.526	185.526		9.50094	76.5009
100	101	100.5	53.009	184.1	184.1		8.24994	75.2499
104	105	104.5	55	179.902	181.664	1.83986	6.11331	73.1133	1.61392
104	105	104.5	55	181.519
104	105	104.5	55	183.573
108	109	108.5	56.75	172.889	176.678	4.50913	1.73913	68.7391	3.95538
108	109	108.5	56.75	175.479
108	109	108.5	56.75	181.665
114	115	114.5	59.375	177.681	179.332	1.44767	4.06713	71.0671	1.26989
114	115	114.5	59.375	181.212
114	115	114.5	59.375	179.251
114	115	114.5	59.375	179.183
120	121	120.5	62	181.329	181.329		5.8194	72.8194
124	125	124.5	63.75	175.319	175.826	3.39136	0.991818	67.9918	2.97488
124	125	124.5	63.75	180.547
124	125	124.5	63.75	172.479
124	125	124.5	63.75	174.959
128	129	128.5	65.5	167.053	168.701	1.59903	-5.25767	61.7423	1.40266
128	129	128.5	65.5	168.805
128	129	128.5	65.5	170.246
132	133	132.5	67.25	172.461	172.144	2.14938	-2.23767	64.7623	1.88543
132	133	132.5	67.25	174.118
132	133	132.5	67.25	169.854
136	137	136.5	69	172.297	172.39	3.81587	-2.0224	64.9776	3.34726
136	137	136.5	69	168.621
136	137	136.5	69	176.251
140	141	140.5	70.75	175.985	174.727	2.1845	0.0277435	67.0277	1.91623
140	141	140.5	70.75	172.204
140	141	140.5	70.75	175.991
144	145	144.5	72.5	184.003	180.745	3.11472	5.30678	72.3068	2.73221
144	145	144.5	72.5	180.435
144	145	144.5	72.5	177.797
148	149	148.5	74.25	181.846	181.846		6.27285	73.2728
152	153	152.5	76	173.918	176.004	3.14447	1.14777	68.1478	2.75831
152	153	152.5	76	174.472
152	153	152.5	76	179.621
156	157	156.5	77.75	175.103	175.103		0.357899	67.3579
160	161	160.5	79.5	177.085	177.085		2.09661	69.0966
164	165	164.5	81.25	167.764	171.221	2.9944	-3.04779	63.9522	2.62667
164	165	164.5	81.25	172.897
164	165	164.5	81.25	173.002
168	169	168.5	83	173.811	173.811		-0.775377	66.2246
172	173	172.5	84	168.627	171.95	3.02909	-2.40803	64.592	2.6571
172	173	172.5	84	172.667
172	173	172.5	84	174.556
176	177	176.5	85	174.104	174.104		-0.518936	66.4811
180	181	180.5	86	169.467	169.467		-4.58638	62.4136
184	185	184.5	87	169.448	168.652	1.80829	-5.30114	61.6989	1.58622
184	185	184.5	87	169.925
184	185	184.5	87	166.582
188	189	188.5	90	174.22	174.22		-0.416463	66.5835
192	193	192.5	93	173.586	173.586		-0.972836	66.0272
196	197	196.5	96	173.968	173.968		-0.637642	66.3624
200	201	200.5	98.8889	175.377	175.377		0.598385	67.5984
202	203	202.5	100.333	174.077	174.077		-0.542296	66.4577
204	205	204.5	101.778	177.114	177.114		2.12138	69.1214
206	207	206.5	103.222	170.776	170.776		-3.43833	63.5617
208	209	208.5	104.667	164.843	164.843		-8.64242	58.3576
210	211	210.5	106.111	167.285	167.285		-6.50031	60.4997
212	213	212.5	107.556	169.515	172.905	4.79358	-1.57049	65.4295	4.2049
212	213	212.5	107.556	176.294
214	215	214.5	109	163.749	163.749		-9.6021	57.3979
216	217	216.5	109.5	169.923	169.923		-4.18635	62.8136
218	219	218.5	110	169.892	169.892		-4.2131	62.7869
220	221	220.5	110.5	172.727	172.727		-1.72627	65.2737
222	223	222.5	111	168.709	168.709		-5.25148	61.7485
224	225	224.5	111.5	164.355	164.355		-9.07053	57.9295
226	227	226.5	112	161.7	161.7		-11.3992	55.6008
228	229	228.5	113.222	166.398	167.662	1.78794	-6.16965	60.8303	1.56836
228	229	228.5	113.222	168.926
230	231	230.5	114.444	165.773	165.773		-7.82643	59.1736
232	233	232.5	115.667	166.446	166.446		-7.23573	59.7643
234	235	234.5	116.889	164.638	164.638		-8.82204	58.178
236	237	236.5	118.111	170.361	170.361		-3.80224	63.1978
238	239	238.5	119.333	171.304	171.304		-2.97517	64.0248
240	241	240.5	120.556	170.274	170.274		-3.87794	63.1221
242	243	242.5	121.778	174.541	174.541		-0.135594	66.8644
244	245	244.5	123	171.257	169.521	2.45415	-4.53846	62.4615	2.15276
244	245	244.5	123	167.786
246	247	246.5	124	177.848	177.848		2.76584	69.7658
248	249	248.5	125	172.882	172.882		-1.59053	65.4095
250	251	250.5	126	172.18	172.18		-2.20635	64.7936
252	253	252.5	127	175.679	175.679		0.862605	67.8626
254	255	254.5	128	175.878	175.878		1.03753	68.0375
256	257	256.5	129	182.947	182.947		7.23822	74.2382
258	259	258.5	130	179.417	179.417		4.14152	71.1415
260	261	260.5	132.5	175.601	175.332	0.380023	0.558647	67.5586	0.333354
260	261	260.5	132.5	175.063
262	263	262.5	135	182.543	182.543		6.88364	73.8836
264	265	264.5	136.167	179.704	179.704		4.39358	71.3936
266	267	266.5	137.333	186.498	186.498		10.3536	77.3536
268	269	268.5	138.5	182.098	182.098		6.49335	73.4934
270	271	270.5	139.667	182.03	182.03		6.43367	73.4337
272	273	272.5	140.833	179.628	179.962	1.28857	4.61972	71.6197	1.13032
272	273	272.5	140.833	178.873
272	273	272.5	140.833	181.384
274	275	274.5	142	178.8	178.8		3.60028	70.6003

## Sheet: Table S6
Table S6. MW91-9 GGC48 benthic d18O and d13C
Data source:
Age < 50 ka, data from Yu, J. et al., 2010. Loss of carbon from the deep sea since the Last Glacial Maximum. Science, 330: 1084-1087, doi: 10.1126/science.1193221.
Age > 50 ka, data from this study
Depth	Depth	Mid depth	Age	d18O	d13C	note
top/cm	bottom/cm	cm	Ka	cib+cw	cib+cw
0	1	0.5	4.16475	2.64743	0.109193
2	3	2.5	4.568	2.58	0.46
4	5	4.5	4.97125	2.75	0.11
6	7	6.5	5.3745	2.56127	0.163
8	9	8.5	5.77775	2.56	0.33
8	9	8.5	5.77775	2.72605	0.342053
10	11	10.5	6.181	3.06097	0.0231044
12	13	12.5	7.348	2.64	0.31
14	15	14.5	8.515	2.71	0.27
14	15	14.5	8.515	2.92	0.15
18	19	18.5	9.98767	3.03559	0.0694638
20	21	20.5	10.724	3.33	-0.1
22	23	22.5	11.353	3.52	-0.12
24	25	24.5	11.982	3.36	-0.18
24	25	24.5	11.982	3.22	-0.14
26	27	26.5	12.9875	4.29	-0.16
26	27	26.5	12.9875	3.73	-0.15
28	29	28.5	13.993	3.66	-0.36
29	30	19.5	14.8	3.70033	-0.458667
30	31	30.5	15.604	3.94	-0.24
32	33	32.5	17.215	4.41141	-0.177626
34	35	34.5	18.826	4.51	-0.29
34	35	34.5	18.826	4.4	-0.13
36	37	36.5	19.5673	4.336	-0.257993
38	39	38.5	20.3085	4.08	-0.22
40	41	40.5	21.0497	4.14	-0.26
42	43	42.5	21.791	4.21	-0.24
44	45	44.5	23.3547	4.24	-0.29
46	47	46.5	24.9185	4.01	-0.31
48	49	48.5	26.4823	3.92	-0.24
50	51	50.5	28.046	4.25057	-0.102593
52	53	52.5	28.5562	4.04	-0.09
54	55	54.5	29.0664	3.93494	-0.0143268
56	57	56.5	29.5766	3.61	-0.3
58	59	58.5	30.0868	3.86	-0.28
62	63	62.5	31.1072	4.00965	-0.0676596
64	65	64.5	31.6174	3.72	-0.04
66	67	66.5	32.1845	3.84415	-0.155686
70	71	70.5	33.6607	3.82546	0.161604
74	75	74.5	35.1369	4.05105	0.0918742
76	77	76.5	35.875	3.86636	-0.0496063
78	79	78.5	36.6131	3.64164	-0.093426
80	81	80.5	37.3512	3.83721	-0.0765337
82	83	82.5	38.0893	3.65795	-0.0127825
82	83	82.5	38.0893	3.38232	-0.369406
84	85	84.5	38.8274	3.52	-0.16
86	87	86.5	39.5655	3.70342	-0.0657281
88	89	88.5	40.3036	3.91445	-0.00445704
88	89	88.5	40.3036	3.899	-0.00603107
90	91	90.5	41.0417	3.69059	-0.0762191
92	93	92.5	41.7798	4.37654	0.320058
94	95	94.5	42.5179	3.95166	0.13318
96	97	96.5	43.256	4.18727	-0.279331
98	99	98.5	43.994	3.72235	0.00599961
100	101	100.5	44.7321	3.78784	0.048689
104	105	104.5	46.2083	3.57311	0.0259329
106	107	106.5	46.9464	3.87878	0.103316
108	109	108.5	47.6845	3.78414	0.108608
112	113	112.5	49.1607	3.71952	0.0700808
114	115	114.5	49.8988	3.90598	-0.133257
120	121	120.5	52.1131	3.67122	-0.347965
122	123	122.5	52.8512	3.75673	-0.091921
124	125	124.5	53.5893	3.72213	-0.142165
128	129	128.5	55.0655	3.61748	-0.329163
130	131	130.5	55.8036	3.75303	-0.28884
132	133	132.5	56.5417	3.36	-0.07
136	137	136.5	58.0179	3.62835	-0.293236
138	139	138.5	58.756	4.13422	-0.104894
140	141	140.5	59.494	3.85942	-0.286148
142	143	142.5	60.2321	3.86	-0.14
144	145	144.5	60.9702	4.21516	-0.403083
148	149	148.5	62.4464	4.04	-0.39
150	151	150.5	63.3077	4.34081	-0.302231
152	153	152.5	64.5385	4.05253	-0.42882
154	155	154.5	65.7692	4.20459	-0.270652
156	157	156.5	67	3.56604	-0.246298
160	161	160.5	69.4615	3.81817	-0.412541
164	165	164.5	71.9231	4.09	-0.34
170	171	170.5	75.6154	3.26	0.15
176	177	176.5	79.2685	3.07954	-0.010268
184	185	184.5	83.5648	3.07535	0.0303445
186	187	186.5	84.6389	3.29	-0.06
192	193	192.5	87.8611	3.0873	-0.127789
196	197	196.5	90.0093	3.02	-0.08
200	201	200.5	92.1574	3.18318	0.0164569
202	203	202.5	93.2315	3.13508	-0.0861433
204	205	204.5	94.3056	3.02694	-0.101105
206	207	206.5	95.3796	3.07891	0.0711515
208	209	208.5	96.4537	2.84066	-0.0357291
210	211	210.5	97.5278	3.11	0.06
212	213	212.5	98.6019	2.85261	0.0201639
214	215	214.5	99.6759	2.98	-0.25
216	217	216.5	100.75	2.96	0.02
218	219	218.5	101.824	3.09	0.11
220	221	220.5	102.898	2.89458	0.010834
222	223	222.5	103.972	3.10668	-0.0791527
224	225	224.5	105.046	3.0786	0.0744068
226	227	226.5	106.12	3.22065	-0.0025127
228	229	228.5	107.194	3.18643	0.103325
230	231	230.5	108.708	3.40855	0.130718
232	233	232.5	111.542	2.72994	-0.014802
234	235	234.5	114.375	3.27232	0.0766872
236	237	236.5	117.208	3.06409	0.0972108	bio-turbated/reworked?
238	239	238.5	120.042	2.89589	0.0949788	bio-turbated/reworked?
240	241	240.5	122.875	2.95	0.0853106	bio-turbated/reworked?
242	243	242.5	125.357	2.84972	0.144924	bio-turbated/reworked?
244	245	244.5	126.786	3.13189	0.127482	bio-turbated/reworked?
246	247	246.5	128.214	3.08	0.14	bio-turbated/reworked?
248	249	248.5	129.643	3.12382	0.10914	bio-turbated/reworked?
252	253	252.5	132.5	3.506	0.0215746	bio-turbated/reworked?
254	255	254.5	133.929	3.15991	-0.0508943	bio-turbated/reworked?
256	257	256.5	135.5	4.20905	-0.00851201	bio-turbated/reworked?
258	259	258.5	137.5	4.02308	0.0527285	bio-turbated/reworked?
260	261	260.5	139.5	3.67	-0.17	bio-turbated/reworked?
262	263	262.5	141.5	3.70701	-0.470212	bio-turbated/reworked?
264	265	264.5	143.5	3.8	-0.38	bio-turbated/reworked?
266	267	266.5	145.5	3.65	-0.39	bio-turbated/reworked?

## Sheet: Table S7
Talbe S7. MW91-9 GGC48 C. wuellerstorfi B/Ca and calculated DCO3 and CO3
Data source:
Age < 50 ka, data from Yu, J. et al., 2010. Loss of carbon from the deep sea since the Last Glacial Maximum. Science, 330: 1084-1087, doi: 10.1126/science.1193221.
Age > 50 ka, data from this study
			avg=	153.709		1.80491
Depth	Depth	Mid depth	Age	B/Ca	avg B/Ca	sd B/Ca	DCO3	CO3	sd CO3	note
top	bottom		Ka	umol/mol	umol/mol	umol/mol	umol/kg	umol/kg	umol/kg
cm	cm	cm
2	3	2.5	4.568	157.049	157.049		-6	78
4	5	4.5	4.97125	159.863	159.863		-3.53195	80.468
6	7	6.5	5.3745	156.041	156.041		-6.88384	77.1162
8	9	8.5	5.77775	159.042	159.042		-4.25204	79.748
10	11	10.5	6.181	160.364	160.364		-3.09233	80.9077
12	13	12.5	7.348	159.235	159.235		-4.08267	79.9173
14	15	14.5	8.515	157.716	157.716		-5.41467	78.5853
16	17	16.5	9.25133	160.484	160.484		-2.98662	81.0134
18	21	19.5	10.3558	165.362	165.362		1.29247	85.2925
22	23	22.5	11.353	161.694	161.694		-1.92587	82.0741
24	25	24.5	11.982	160.991	162.641	2.33406	-1.09441	82.9056	2.04742
24	25	24.5	11.982	164.292
26	27	26.5	12.9875	165.418	164.993	0.600634	0.968503	84.9685	0.526872
26	27	26.5	12.9875	164.568
28	29	28.5	13.993	164.082	164.082		0.168986	84.169
29	30	29.5	14.7985	159.451	160.541	1.54168	-2.9365	81.0635	1.35235
29	30	29.5	14.7985	161.632
30	31	30.5	15.604	159.405	159.405		-3.93337	80.0666
32	33	32.5	17.215	153.65	153.65		-8.98128	75.0187
33	34	33.5	18.0205	151.749	151.749		-10.6489	73.3511
34	35	34.5	18.826	150.542	150.542		-11.7078	72.2922
36	37	36.5	19.5673	153.409	153.409		-9.19316	74.8068
38	39	38.5	20.3085	149.512	151.837	3.28788	-10.5722	73.4278	2.8841
38	39	38.5	20.3085	154.162
44	45	44.5	23.3547	147.149	147.149		-14.6839	69.3161
46	47	46.5	24.9185	152.355	152.355		-10.1173	73.8827
48	49	48.5	26.4823	147.894	147.894		-14.0308	69.9692
50	51	50.5	28.046	146.816	146.816		-14.9767	69.0233
52	53	52.5	28.5562	149.189	148.298	1.2603	-13.6761	70.3239	1.10553
52	53	52.5	28.5562	147.407
54	55	54.5	29.0664	149.04	149.04		-13.0257	70.9743
56	57	56.5	29.5766	150.819	150.819		-11.4646	72.5354
58	59	58.5	30.0868	150.446	150.446		-11.7921	72.2079
60	61	60.5	30.597	152.39	152.39		-10.0871	73.9129
62	63	62.5	31.1072	149.223	149.223		-12.8651	71.1349
64	65	64.5	31.6174	152.674	152.674		-9.83796	74.162
66	67	66.5	32.1845	157.576	157.576		-5.53749	78.4625
68	69	68.5	32.9226	156.33	156.33		-6.63062	77.3694
72	73	72.5	34.3988	158.843	158.843		-4.42659	79.5734
74	75	74.5	35.1369	162.276	162.276		-1.41491	82.5851
76	77	76.5	35.875	159.629	159.629		-3.73684	80.2632
78	79	78.5	36.6131	163.234	163.234		-0.574495	83.4255
81	82	81.5	37.7202	158.296	158.296		-4.90587	79.0941
84	85	84.5	38.8274	153.638	153.638		-8.99219	75.0078
86	87	86.5	39.5655	153.111	153.111		-9.45441	74.5456
88	89	88.5	40.3036	152.713	152.713		-9.80346	74.1965
90	91	90.5	41.0417	157.166	157.166		-5.89749	78.1025
92	93	92.5	41.7798	153.734	153.734		-8.90822	75.0918
94	95	94.5	42.5179	159.067	159.067		-4.22994	79.7701
96	97	96.5	43.256	157.68	157.68		-5.44634	78.5537
98	99	98.5	43.994	158.456	158.456		-4.76547	79.2345
100	101	100.5	44.7321	154.349	154.349		-8.36814	75.6319
108	109	108.5	47.6845	156.67	156.67		-6.33234	77.6677
112	113	112.5	49.1607	152.866	152.866		-9.66945	74.3306
114	115	114.5	49.8988	155.102	155.102		-7.70828	76.2917
116	117	116.5	50.6369	160.027	160.027		-3.38777	80.6122
120	121	120.5	52.1131	160.478	160.478		-2.99235	81.0076
122	123	122.5	52.8512	168.081	168.081		3.67698	87.677
124	125	124.5	53.5893	155.713	155.713		-7.17199	76.828
128	129	128.5	55.0655	153.038	153.038		-9.51853	74.4815
132	137	134.5	57.2798	151.097	151.097		-11.2215	72.7785
140	141	140.5	59.494	147.016	147.016		-14.8011	69.1989
148	149	148.5	62.4464	150.194	150.194		-12.0132	71.9868
152	153	152.5	64.5385	151.287	151.287		-11.0544	72.9456
156	157	156.5	67	150.901	150.901		-11.3926	72.6074
160	161	160.5	69.4615	141.696	141.696		-19.4673	64.5327
164	165	164.5	71.9231	147.66	147.66		-14.2364	69.7636
168	169	168.5	74.3846	146.635	146.635		-15.1348	68.8652
172	173	172.5	76.8462	151.868	151.868		-10.5445	73.4555
180	181	180.5	81.4167	159.022	159.022		-4.26892	79.7311
188	189	188.5	85.713	146.293	146.293		-15.4352	68.5648
192	193	192.5	87.8611	149.707	149.707		-12.4401	71.5599
196	197	196.5	90.0093	142.569	142.569		-18.7015	65.2985
200	201	200.5	92.1574	148.892	148.892		-13.1554	70.8446
202	203	202.5	93.2315	146.417	146.417		-15.3262	68.6738
204	205	204.5	94.3056	154.046	154.046		-8.63397	75.366
206	207	206.5	95.3796	146.9	146.9		-14.9027	69.0973
208	209	208.5	96.4537	147.725	147.725		-14.179	69.821
212	213	212.5	98.6019	149.401	149.401		-12.7088	71.2912
214	215	214.5	99.6759	152.004	152.004		-10.4255	73.5745
216	217	216.5	100.75	150.74	150.74		-11.5341	72.4659
218	219	218.5	101.824	148.554	148.554		-13.4515	70.5485
220	221	220.5	102.898	140.768	140.768		-20.2817	63.7183
222	223	222.5	103.972	144.25	144.25		-17.2276	66.7724
224	225	224.5	105.046	150.91	150.91		-11.3853	72.6147
226	227	226.5	106.12	150.081	150.081		-12.1123	71.8877
228	229	228.5	107.194	141.788	141.788		-19.3866	64.6134
232	233	232.5	111.542	142.931	142.931		-18.3844	65.6156
234	235	234.5	114.375	145.591	145.591		-16.0512	67.9488
238	239	238.5	120.042	156.879	157.162	0.400128	-5.90092	78.0991	0.35099	bio-turbated/reworked?
238	239	238.5	120.042	157.445						bio-turbated/reworked?
240	241	240.5	122.875	148.995	148.995		-13.0653	70.9347		bio-turbated/reworked?
242	243	242.5	125.357	149.221	149.221		-12.8666	71.1334		bio-turbated/reworked?
244	245	244.5	126.786	153.067	153.067		-9.49295	74.507		bio-turbated/reworked?
246	247	246.5	128.214	155.201	155.201		-7.62112	76.3789		bio-turbated/reworked?
248	249	248.5	129.643	158.926	158.926		-4.3533	79.6467		bio-turbated/reworked?
250	251	250.5	131.071	151.623	151.623		-10.7596	73.2404		bio-turbated/reworked?
252	253	252.5	132.5	143.296	144.111	1.15162	-17.3495	66.6505	1.01019	bio-turbated/reworked?
252	253	252.5	132.5	144.925						bio-turbated/reworked?
254	255	254.5	133.929	151.306	151.306		-11.0378	72.9622		bio-turbated/reworked?
256	257	256.5	135.5	147.148	147.994	1.19595	-13.9429	70.0571	1.04908	bio-turbated/reworked?
256	257	256.5	135.5	148.84						bio-turbated/reworked?
258	259	258.5	137.5	145.015	145.015		-16.5558	67.4442		bio-turbated/reworked?
260	261	260.5	139.5	149.47	150.673	1.7014	-11.5931	72.4069	1.49246	bio-turbated/reworked?
260	261	260.5	139.5	151.876						bio-turbated/reworked?
262	263	262.5	141.5	139.301	139.301		-21.5688	62.4312		bio-turbated/reworked?
264	265	264.5	143.5	145.613	145.613		-16.0315	67.9685		bio-turbated/reworked?
266	267	266.5	145.5	138.274	138.338	0.0906693	-22.4129	61.5871	0.0795345	bio-turbated/reworked?
266	267	266.5	145.5	138.402						bio-turbated/reworked?

## Sheet: Table S8
Table S8. TTNO13-PC61 benthic and planktonic d18O and d13C.
Data source: this study
Depth	Age	d18O	d13C		Depth	Age	d18O
cm	kyr	Cibs/C.w	Cibs/C.w		cm	kyr	P.obli
0	5.3883	3.21371	0.298746		0	5.3883	-0.255378
5	6.65505	2.78358	0.155264		2	5.895	-0.764883
10	7.9218	2.9175	0.0193524		5	6.65505	-0.611161
15	9.18855	3.93393	0.0404401		7	7.16175	-0.545818
20	10.4553	3.62943	-0.0969237		10	7.9218	-0.537045
25	11.8869	3.96476	-0.142292		12	8.4285	-0.556706
30	13.4284	4.10509	-0.0729337		15	9.18855	-0.472926
35	17.3906	3.88	-0.22		17	9.69525	-0.577592
35	17.3906	4.18553	-0.14577		20	10.4553	-0.148863
40	21.6208	4.06116	-0.139531		22	10.962	-0.278544
45	24.9538	4.01524	0.0791117		25	11.8869	0.0452304
50	27.8148	4.05	0.255606		27	12.5035	0.0504965
55	30.3611	4.06572	0.0864754		30	13.4284	0.319308
60	32.9074	3.83576	0.23255		32	14.045	0.159583
65	35.4537	3.866	0.145097		35	17.3906	0.483411
70	38	3.78616	0.0185533		37	19.621	0.338654
75	39.8333	3.61668	0.011125		40	21.6208	0.217603
80	41.6667	3.90714	0.214537		42	22.954	0.437742
85	43.5	3.73722	0.155247		45	24.9538	0.351712
90	45.3333	3.82751	0.162083		47	26.287	0.496839
95	47.1667	3.75768	0.0459041		50	27.8148	0.144161
100	49	3.70786	0.100279		52	28.8333	0.424181
105	50.8333	3.38782	-0.0181513		55	30.3611	0.278273
110	52.6667	3.56818	0.0605554		57	31.3796	0.273322
115	54.5	3.67849	-0.040303		60	32.9074	0.202423
120	56.3333	3.5365	-0.0662668		62	33.9259	0.14246
125	58.1667	3.67871	-0.0197235		65	35.4537	0.0165912
130	60	3.78947	-0.250651		67	36.4722	0.00159996
140	70	3.71234	-0.123672		70	38	-0.139247
145	75	3.22	-0.03		72	38.7333	-0.079273
145	75	3.48788	0.142774		75	39.8333	0.0348587
150	78.3333	3.19942	0.313433		77	40.5667	0.0897992
155	81.6667	3.40982	0.219896		80	41.6667	-0.0609906
160	85	3.39002	0.144836		82	42.4	-0.0410627
166	89	3.34	-0.09		85	43.5	0.0631248
166	89	3.30346	0.193846		90	45.3333	-0.202699
170	91.2857	3.42027	-0.124546		95	47.1667	-0.088582
175	94.1429	3.23033	0.0736832		100	49	-0.0861785
180	97	3.22054	0.126706		105	50.8333	-0.292017
185	109	3.33085	-0.0276605		110	52.6667	-0.107907
190	114.333	3.14092	0.0742526		115	54.5	-0.143768
195	119.667	3.31	0.02		120	56.3333	-0.0796413
195	119.667	3.57938	0.0475497		125	58.1667	0.00448338
200	125	2.94705	0.211165		130	60	0.148602
206	128	3.1219	0.0255167		135	65	0.222729
210	130	3.69705	-0.0773414		140	70	-0.133098
215	132.5	3.23	-0.14		145	75	-0.298948
220	135	4.31	-0.51		150	78.3333	-0.0640259
225	137.5	4.24219	-0.361105		155	81.6667	-0.153887
230	140	3.58643	-0.0799557		160	85	-0.0237592
235	142.5	4.11155	-0.341642		166	89	0.166365
240	145	3.96618	-0.291753		170	91.2857	-0.203481
245	147.5	3.87084	-0.318462		175	94.1429	-0.399905
250	150	4.03569	-0.300452		180	97	-0.457344
255	152.5	3.99039	-0.393058		185	109	-0.134834
260	155	3.7	0.03		190	114.333	-0.332253
260	155	3.71662	-0.143688		195	119.667	-0.729648
270	160	3.85	-0.54		200	125	-0.597112
					206	128	-0.154614
					210	130	-0.112065
					215	132.5	0.170456
					220	135	0.193008
					225	137.5	0.350656
					230	140	0.143234
					235	142.5	0.385526
					240	145	0.547815
					245	147.5	0.340141
					250	150	0.472434
					255	152.5	0.404746
					260	155	0.0370855
					265	157.5	0.469351
					270	160	0.346278

## Sheet: Table S9
Table S9. TTNO13 PC61 C. wuellerstorfi B/Ca and calculated DCO3 and CO3.
Data source: this study
	avg=	147.928		2.9869
Depth	Age	B/Ca	avg B/Ca	sd B/Ca	DCO3	CO3	avg CO3	sd CO3
top-cm	ka	umol/mol	umol/mol	umol/mol	umol/kg	umol/kg	umol/kg	umol/kg
0	5.3883	140.031	140.031		-18.3582	79.63	79.63
2	5.895	143.465	143.465		-15.346	82.6422	82.6422
5	6.65505	149.037	148.823	0.302158	-10.4587	87.5294	87.342	0.26505
5	6.65505	148.609			-10.8336	87.1546
7	7.16175	150.084	152.639	3.61362	-9.53988	88.4483	90.6897	3.16984
7	7.16175	155.195			-5.05706	92.9311
8	7.4151	145.681	145.681		-13.4026	84.5855	84.5855
10	7.9218	147.791	147.791		-11.5514	86.4367	86.4367
11	8.17515	153.398	151.106	3.24053	-6.63315	91.355	89.345	2.84257
11	8.17515	148.815			-10.6532	87.335
12	8.4285	147.215	147.215		-12.057	85.9312	85.9312
15	9.18855	148.147	148.147		-11.2391	86.7491	86.7491
16	9.4419	155.682	155.682		-4.62987	93.3583	93.3583
17	9.69525	151.61	151.61		-8.2012	89.787	89.787
18	9.9486	154.482	154.482		-5.6817	92.3065	92.3065
22	10.962	147.024	147.024		-12.2238	85.7644	85.7644
25	11.8869	152.354	152.354		-7.54846	90.4397	90.4397
26	12.1952	144.955	142.822	3.01684	-14.0389	83.9493	82.078	2.64635
26	12.1952	140.689			-17.7814	80.2068
27	12.5035	152.169	152.169		-7.7112	90.277	90.277
30	13.4284	149.495	149.495		-10.0566	87.9316	87.9316
31	13.7367	148.027	148.027		-11.3442	86.644	86.644
35	17.3906	144.325	144.325		-14.5922	83.396	83.396
36	18.5058	145.225	145.225		-13.8023	84.1859	84.1859
37	19.621	144.516	144.516		-14.4245	83.5637	83.5637
40	21.6208	149.934	149.934		-9.67119	88.317	88.317
42	22.954	151.687	151.687		-8.13358	89.8546	89.8546
44	24.2872	152.453	149.817	3.72678	-7.46226	90.5259	88.2143	3.2691
44	24.2872	147.182			-12.0855	85.9027
45	24.9538	156.802	156.802		-3.64726	94.3409	94.3409
47	26.287	152.775	152.775		-7.17915	90.809	90.809
50	27.8148	153.367	153.367		-6.66062	91.3276	91.3276
51	28.324	152.279	155.494	4.54776	-7.61484	90.3733	93.1942	3.98926
51	28.324	158.71			-1.97317	96.015
52	28.8333	151.825	151.825		-8.01296	89.9752	89.9752
55	30.3611	154.694	154.694		-5.49582	92.4924	92.4924
57	31.3796	160.127	157.676	3.4658	-0.730253	97.2579	95.1082	3.04017
57	31.3796	155.226			-5.02971	92.9585
60	32.9074	154.29	154.29		-5.85023	92.138	92.138
62	33.9259	151.834	151.834		-8.00525	89.9829	89.9829
63	34.4352	158.04	158.04		-2.56147	95.4267	95.4267
65	35.4537	153.489	153.489		-6.55347	91.4347	91.4347
67	36.4722	159.217	154.562	4.59435	-1.52856	96.4596	92.3762	4.03013
67	36.4722	150.031			-9.58662	88.4016
67	36.4722	154.438			-5.72069	92.2675
70	38	145.832	145.832		-13.2695	84.7187	84.7187
72	38.7333	143.891	143.891		-14.9727	83.0155	83.0155
75	39.8333	153.563	153.563		-6.48804	91.5002	91.5002
77	40.5667	153.433	156.018	3.6553	-6.60209	91.3861	93.6534	3.2064
77	40.5667	158.603			-2.06755	95.9206
80	41.6667	146.773	146.773		-12.4443	85.5438	85.5438
82	42.4	152.039	152.039		-7.82494	90.1633	90.1633
83	42.7667	160.014	160.169	0.218623	-0.82948	97.1587	97.2943	0.191775
83	42.7667	160.323			-0.55827	97.4299
85	43.5	148.714	148.714		-10.7417	87.2464	87.2464
91	45.7	148.398	148.398		-11.0193	86.9689	86.9689
95	47.1667	143.86	143.86		-15.0001	82.9881	82.9881
100	49	152.204	152.204		-7.68032	90.3079	90.3079
105	50.8333	142.894	142.894		-15.8468	82.1414	82.1414
110	52.6667	145.243	145.243		-13.7869	84.2012	84.2012
115	54.5	154.378	154.378		-5.77327	92.2149	92.2149
120	56.3333	150.56	150.56		-9.12227	88.8659	88.8659
125	58.1667	151.765	151.765		-8.06515	89.923	89.923
130	60	144.881	144.881		-14.1036	83.8845	83.8845
135	65	136.766	136.766		-21.2227	76.7655	76.7655
140	70	134.024	134.024		-23.6279	74.3603	74.3603
145	75	149.323	149.323		-10.2075	87.7807	87.7807
150	78.3333	143.742	145.834	2.95915	-15.1035	82.8847	84.7202	2.59575
150	78.3333	147.927			-11.4325	86.5557
155	81.6667	127.977	129.746	2.50193	-28.9325	69.0557	70.6075	2.19468
155	81.6667	131.515			-25.8288	72.1594
160	85	139.488	139.488		-18.8352	79.153	79.153
166	89	149.684	149.684		-9.89132	88.0969	88.0969
170	91.2857	135.945	135.945		-21.9431	76.0451	76.0451
175	94.1429	142.104	142.104		-16.5402	81.448	81.448
180	97	148.934	148.934		-10.549	87.4392	87.4392
185	109	139.262	139.262		-19.0329	78.9553	78.9553
190	114.333	136.524	136.524		-21.4348	76.5534	76.5534
195	119.667	135.546	135.546		-22.293	75.6952	75.6952
200	125	133.17	133.17		-24.377	73.6112	73.6112
206	128	132.529	132.529		-24.9394	73.0488	73.0488
210	130	136.01	136.01		-21.8859	76.1023	76.1023
215	132.5	137.181	137.181		-20.8586	77.1295	77.1295
220	135	144.318	144.318		-14.5983	83.3899	83.3899
225	137.5	141.306	141.306		-17.2404	80.7478	80.7478
230	140	143.851	143.851		-15.0078	82.9803	82.9803
235	142.5	139.735	139.735		-18.6178	79.3704	79.3704
240	145	159.898	159.898		-0.931362	97.0568	97.0568
245	147.5	146.07	146.07		-13.0614	84.9268	84.9268
250	150	151.413	151.413		-8.3739	89.6143	89.6143
255	152.5	142.486	142.486		-16.2046	81.7836	81.7836
260	155	151.384	151.384		-8.39997	89.5882	89.5882
265	157.5	144.806	144.806		-14.17	83.8182	83.8182
270	160	158.514	158.514		-2.14536	95.8428	95.8428

## Sheet: Table S10
Table S10. Radiocarbon dates for TTNO13-PC61
	Canlender ages are calculated using Calib 6.01 and Marine 09 curve assuming a constant reservior age of 400 years
depth	Species	Accession #	14C age	Age Err	lower	upper	median	median	note
cm			yr	yr	yr BP	yr BP	yr BP	kyr, BP
2-3	P. obliq	OS-82241	5510	40	5850	5944	5895	5.895
12-13	P. obliq	OS-82242	4830	30	5059	5206	5134	5.134	age reversal, excluded
22-23	P. obliq	OS-82243	9980	45	10886	11097	10962	10.962
32-33	P. obliq	OS-82244	12600	50	13958	14128	14045	14.045
37-38	P. obliq	OS-82245	16900	75	19454	19590	19621	19.621
47-48	P. obliq	OS-82246	22300	85	26043	26347	26287	26.287

[truncated: 2 more sheets: Table S11, Table S12]
